# Supplementary material for: Ultrasmall biomolecule-anchored hybrid GdVO4 nanophosphors as a metabolizable multimodal bioimaging contrast agent
Source: Royal Society of Chemistry journal article supplement (doi:10.1039/c4nr03819c), 2014-01-01
Supplement: c4nr03819c1.pdf [file c4nr03819c1.pdf]

## Electronic Supplementary Information

# Ultrasmall biomolecule-anchored hybrid GdVO<sub>4</sub> nanophosphors as a metabolizable multimodal bioimaging contrast agent

*Kai Dong<sup>a,b</sup>, Enguo Ju<sup>a,b</sup>, Jianhua Liu<sup>c</sup>, Xueli Han<sup>c</sup>, Jinsong Ren<sup>\*,a</sup> and Xiaogang*

*Qu<sup>\*,a</sup>*

<sup>a</sup> State Key laboratory of Rare Earth Resources Utilization and Laboratory of Chemical Biology, Changchun Institute of Applied Chemistry, Changchun, Jilin 130022, China

<sup>b</sup> University of the Chinese Academy of Sciences, Beijing, 100039, China

<sup>c</sup> Department of Radiology, the Second Hospital of Jilin University, Changchun, Jilin 130041, China

\* Corresponding author. Tel./Fax: +86 431 85262625.

E-mail address: [jren@ciac.ac.cn](mailto:jren@ciac.ac.cn).

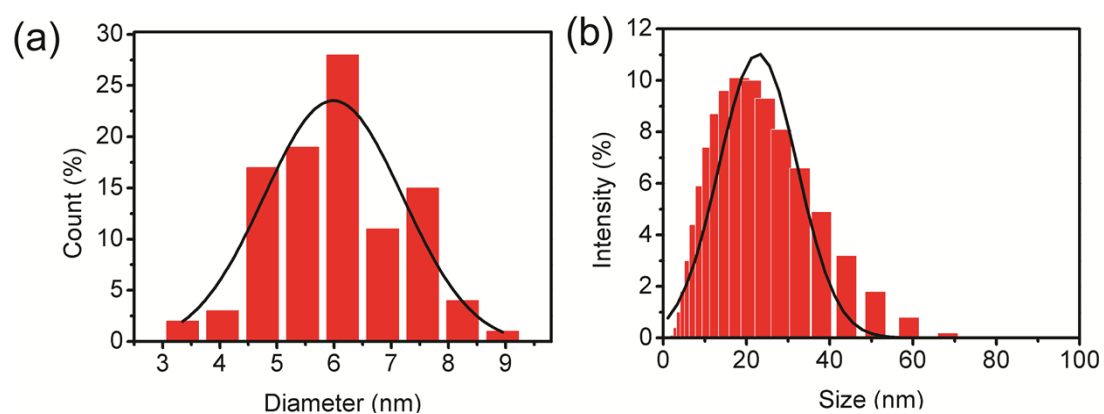

**Fig. S1** (a) Particle-size distribution of 6-aminocaproic acid capped  $\text{GdVO}_4:\text{Eu}^{3+}$  nanoparticles was observed from TEM images. (b) The hydrodynamic diameter of  $\text{GdVO}_4:\text{Eu}^{3+}$  nanoparticle was measured by dynamic light scattering (DLS).

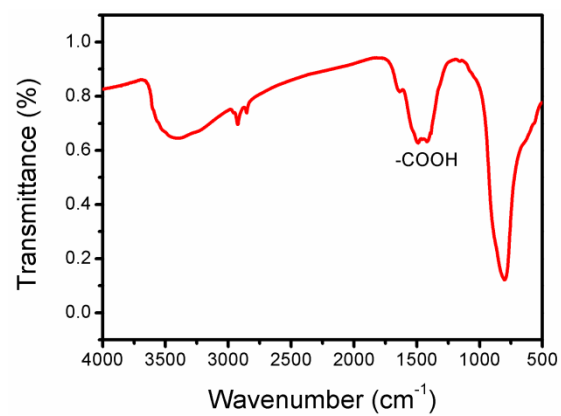

**Fig. S2** FTIR spectrum of 6-aminocaproic acid capped GdVO<sub>4</sub>:Eu<sup>3+</sup> nanoparticles.

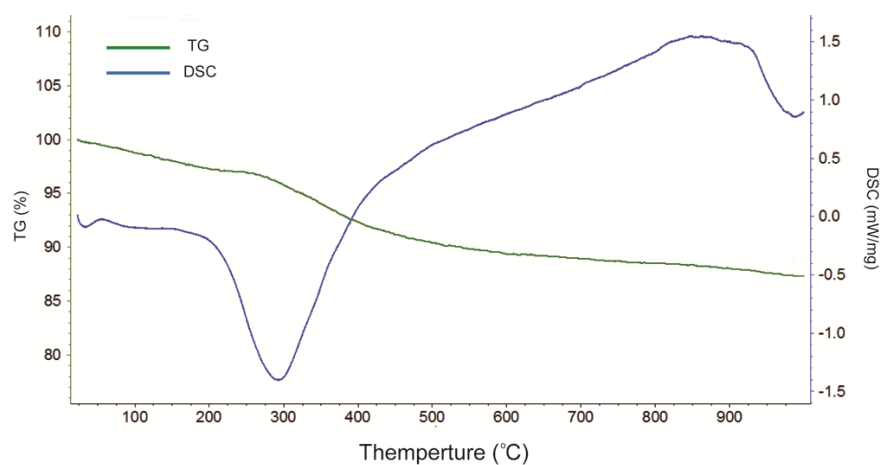

**Fig. S3** Thermogravimetric analysis (TGA) curve of 6-aminocaproic acid capped GdVO<sub>4</sub>:Eu<sup>3+</sup> nanoparticles.

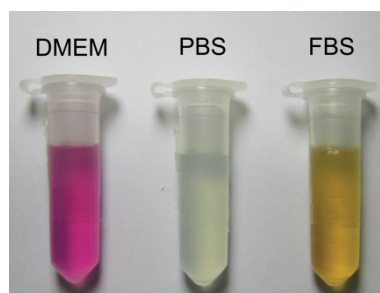

**Fig. S4** Photos of 6-aminocaproic acid capped  $\text{GdVO}_4:\text{Eu}^{3+}$  nanoparticles in various solutions including phosphate buffered saline (PBS), DMEM cell medium, and fetal bovine serum (FBS).

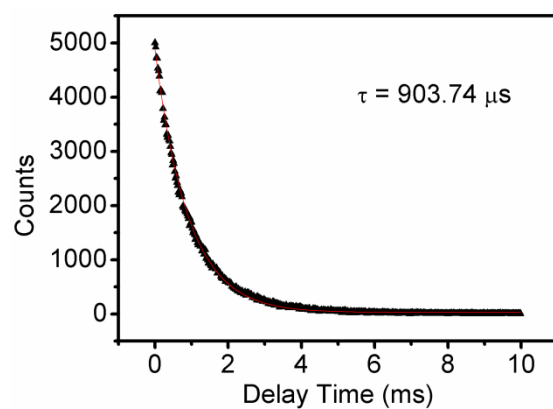

**Fig. S5** Phosphorescence decay of the aqueous nanoparticles collected at 620 nm (black dots). The red line is the best-fit curve.

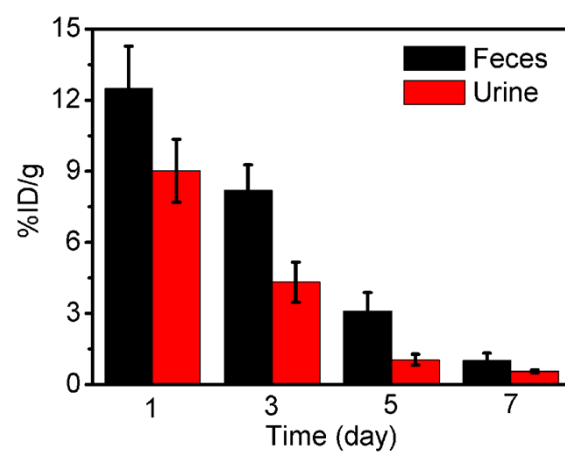

**Fig. S6** Gd contents in mice excretions (feces and urine) in the first week after intravenous injection.

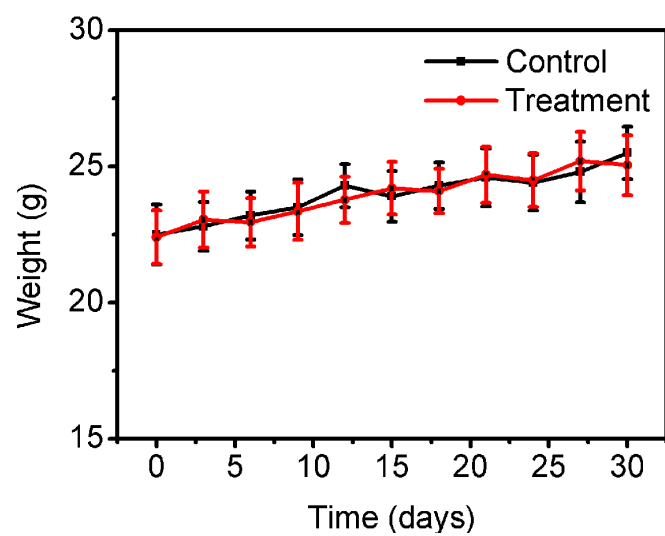

**Fig. S7** Change in body weight obtained from mice injected with  $\text{GdVO}_4\text{:Eu}^{3+}$  nanoparticles and without injection.



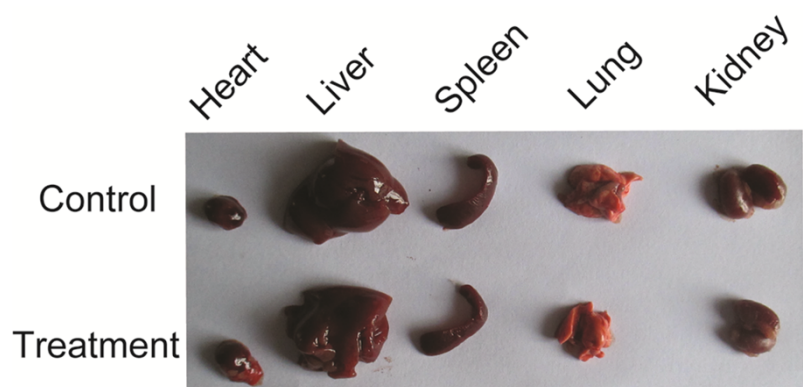

**Fig. S8** photos of mice organs with and without intravenous administration.

**Table S1.** Hematology analysis and blood biochemical assay.

| Test                 | Units                | Control<br>(mean±sd) | Treatment<br>(mean±sd) |
|----------------------|----------------------|----------------------|------------------------|
| <b>Hematological</b> |                      |                      |                        |
| WBC                  | ×10 <sup>9</sup> /L  | 5.27±0.90            | 5.56±0.75              |
| RBC                  | ×10 <sup>12</sup> /L | 9.05±1.05            | 9.85±0.92              |
| HGB                  | g/L                  | 142.50±15.00         | 153.00±17.50           |
| MCV                  | fL                   | 51.00±1.50           | 57.50±2.00             |
| MCH                  | pg                   | 15.00±0.50           | 15.80±1.00             |
| MCHC                 | g/L                  | 255.00±28.00         | 278.00±25.00           |
| PLT                  | ×10 <sup>9</sup> /L  | 610.00±50.00         | 625.00±45.00           |
| LY                   | %                    | 70.00±2.00           | 72.00±1.50             |
| NE                   | %                    | 12.80±0.90           | 12.90±1.50             |
| <b>Biochemistry</b>  |                      |                      |                        |
| ALT                  | U/L                  | 40.50±8.50           | 45.00±5.50             |
| AST                  | U/L                  | 68.50±9.50           | 62.50±13.00            |
| BUN                  | mmol/L               | 6.20±0.80            | 6.80±0.60              |
| CRE                  | mmol/L               | 29.50±7.50           | 30.50±9.50             |
